# Supplementary material for: What’s the Madder? Characterization of Old Fashioned Alizarin/Aluminum Red Pigments Using Liquid and Solid-State NMR
Source: MDPI journal article supplement (doi:10.3390/colorants2040031), 2023-09-30
Supplement: s1 [file s1]

## Supplementary

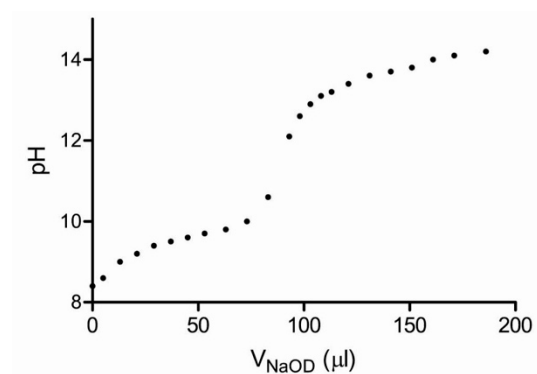

**Figure S1.** Titration curve of alizarin in DMSO- $d_6$  containing residual water ( $c = 10,6 \text{ mg.ml}^{-1}$ ;  $0,044 \text{ mmol.ml}^{-1}$ ) using NaOD solution in D<sub>2</sub>O ( $c = 0,33 \text{ mmol.ml}^{-1}$ ) at 298K.

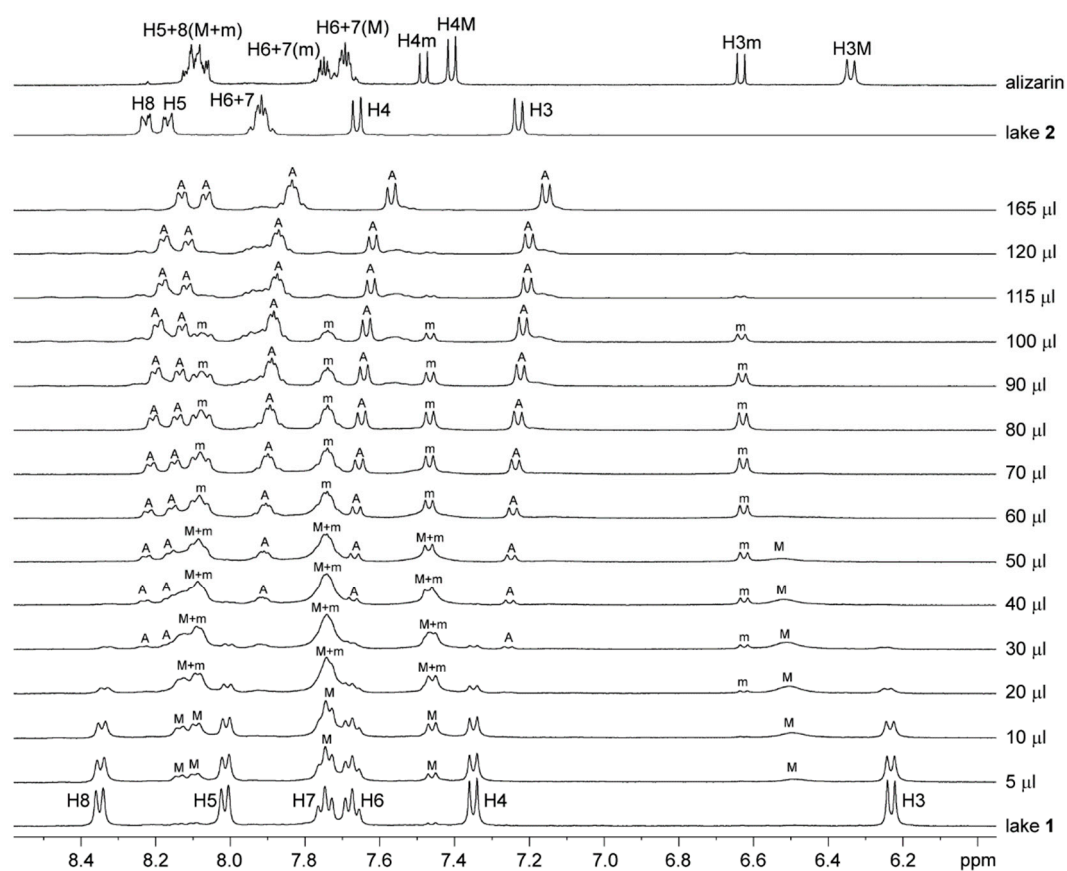

**Figure S2.**  $^1\text{H}$  NMR spectra (DMSO- $d_6$ ) of lake 1 with increasing volumes of DCI ( $c = 0.24 \text{ mmol/ml}$ ). "M" and "m" refer to species 2M and 2m, respectively, and "A" stands for alizarin.

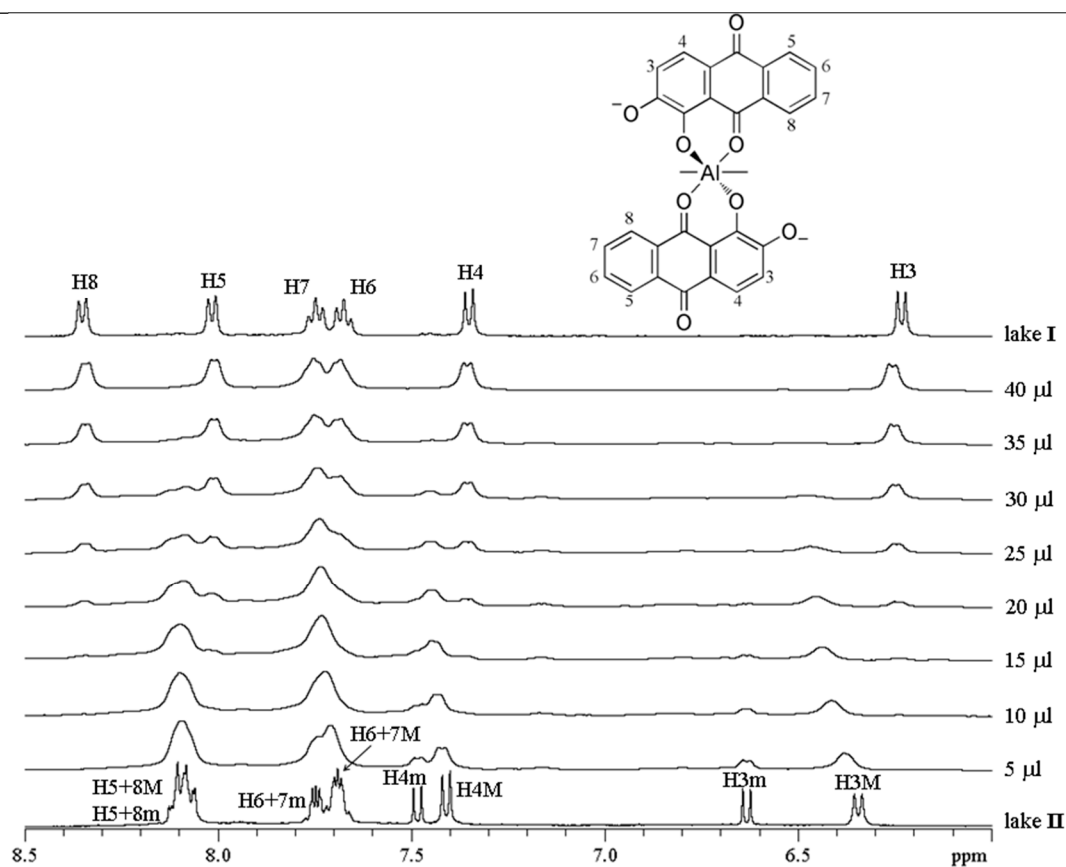

**Figure S3.**  $^1\text{H}$  NMR spectra ( $\text{DMSO}-d_6$ ) of lake 2 with increasing volumes of NaOD ( $c = 0.33 \text{ mmol/ml}$ ) and comparison with lake 1.

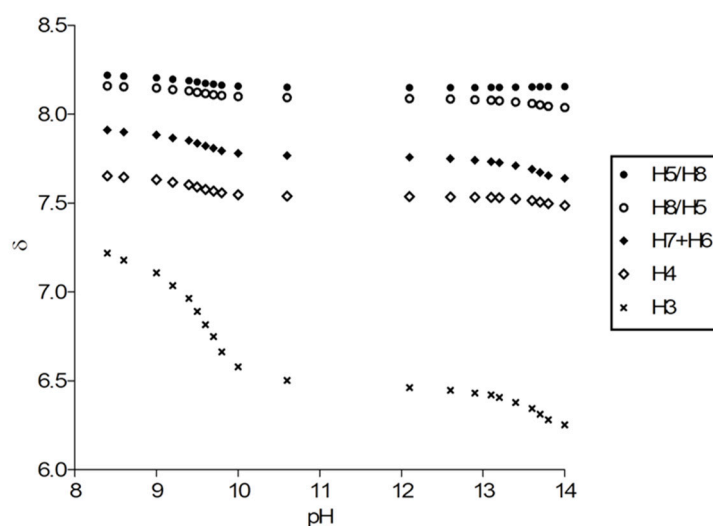

**Figure S4.**  $^1\text{H}$  chemical shifts of alizarin as function of pH, in  $\text{DMSO}-d_6$  solution containing residual water.

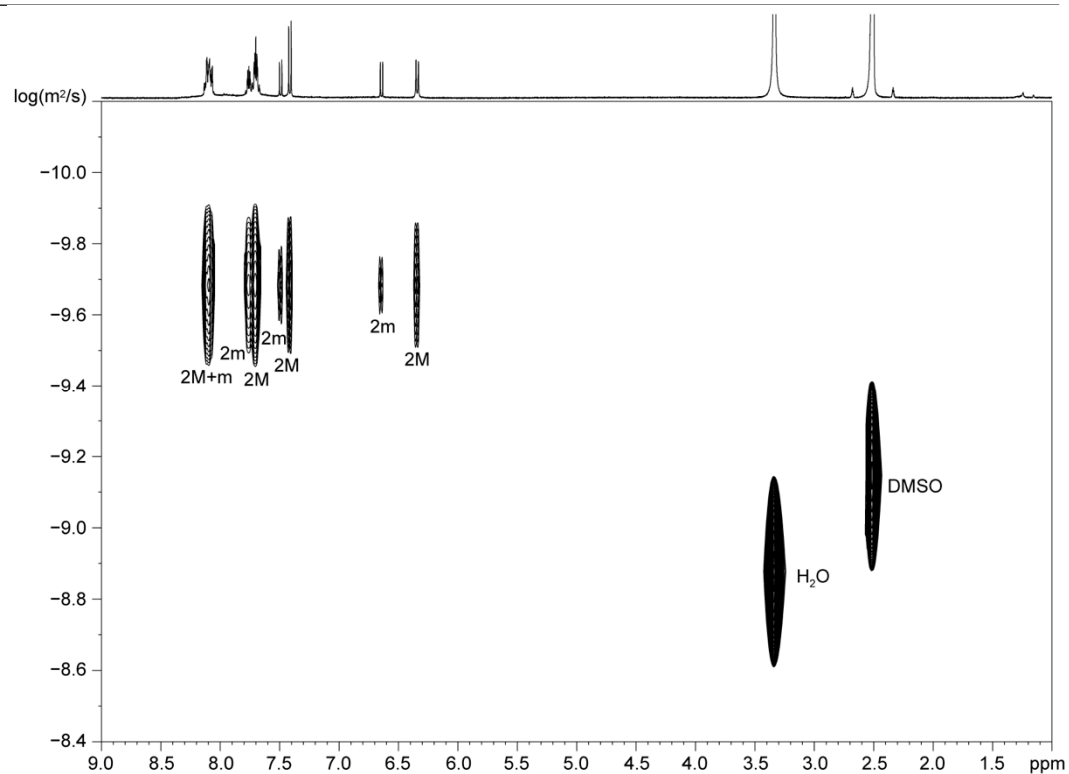

Figure S5. H-DOSY spectrum of lake 2 in DMSO- $d_6$ , at 298K.

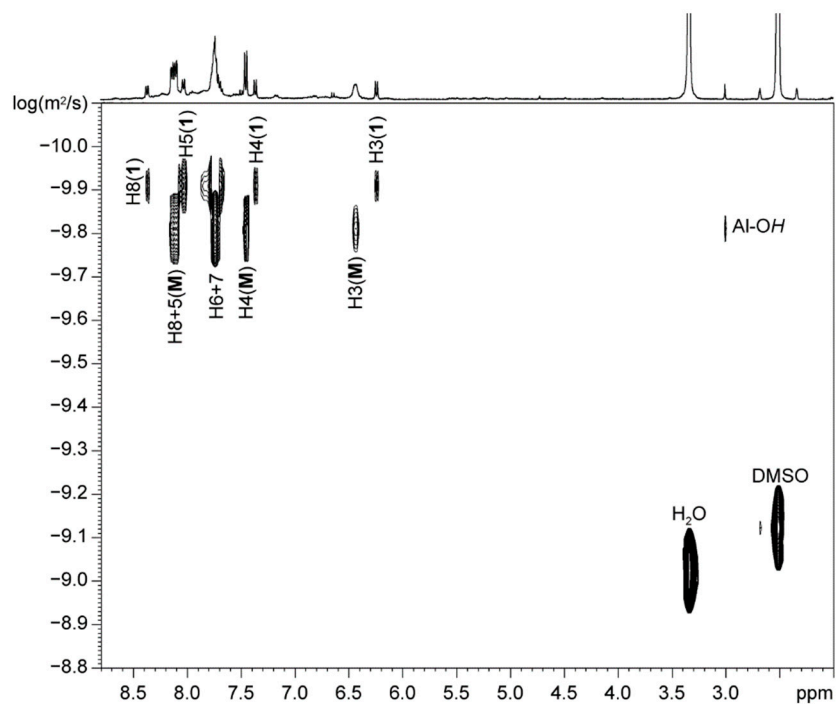

Figure S6. H-DOSY spectrum of a mixture of lakes 1 and 2 in DMSO- $d_6$ , at 298K.

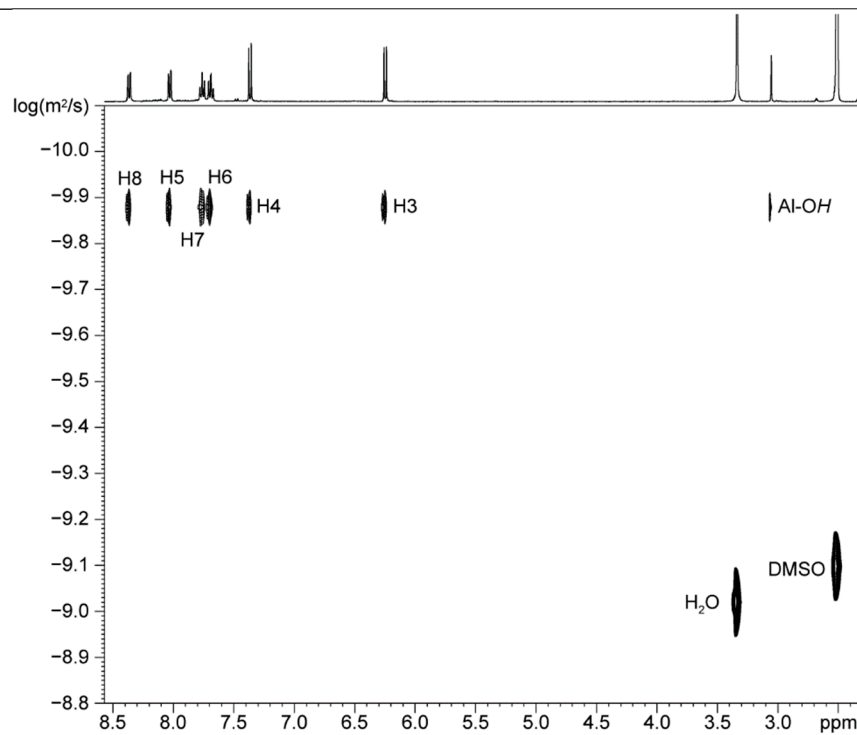

**Figure S7.** H-DOSY spectrum of lake 1 in DMSO- $d_6$ , at 298K.
